# Supplementary material for: Thermal decomposition mechanisms of energetic CL-20-based co-crystals: quantum molecular dynamics simulations
Source: Research Square preprint supplement (doi:10.21203/rs.3.rs-1638411/v1), 2022-05-19
Supplement: Supplementary file 1 [file 63ab6bcc66b50679a5b9d2cb.docx]

**Thermal decomposition mechanisms of energetic CL-20-based co-crystals: quantum molecular dynamics simulation**

Li Tang[[1]](#footnote-0) · Weihua Zhu1


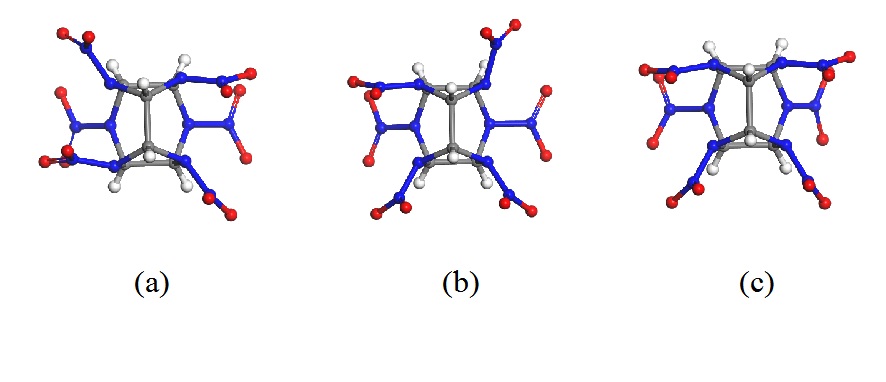


**Fig. S1** Molecular conformations and crystal structures of (a) *β*-CL-20, (b) *γ*-CL-20 and (c) *ε*-CL-20


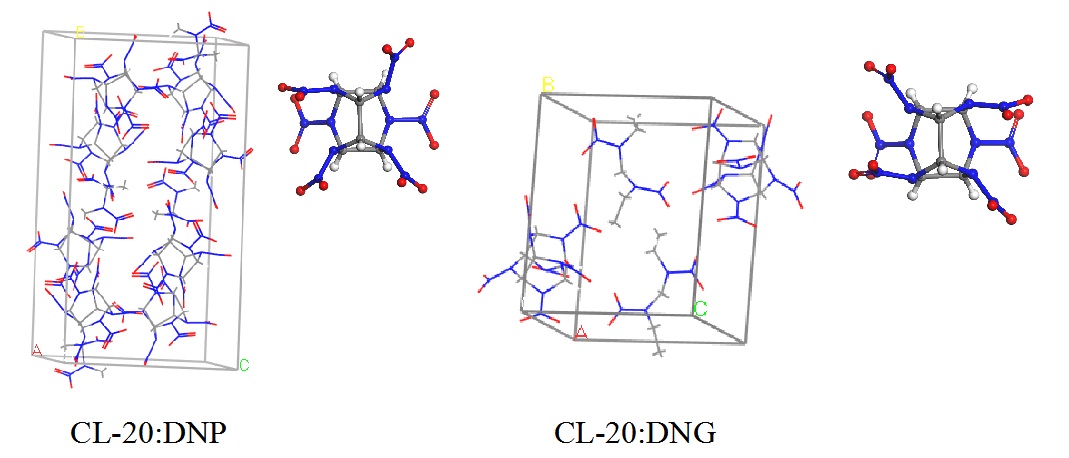


**Fig. S2** Crystal structures and phases of CL-20 in CL-20:DNP and CL-20:DNG co-crystals

**Table S1** Bond type and bond cutoff radius in the fragment analysis of the DFTB-MD trajectory

| Bond type | Cutoff radius(Å) | Bond type | Cutoff radius(Å) |
| --- | --- | --- | --- |
| C−C | 2.31 | H−O | 1.50 |
| C−H | 1.63 | H−N | 1.61 |
| C−O | 2.15 | O−O | 2.22 |
| C−N | 2.20 | O−N | 2.10 |
| H−H | 1.11 | N−N | 2.17 |

1. Corresponding author: Wei-hua Zhu, zhuwh@njust.edu.cn

   Institute for Computation in Molecular and Materials Science, School of Chemistry and Chemical Engineering, Nanjing University of Science and Technology, Nanjing 210094, China [↑](#footnote-ref-0)
